# Supplementary material for: Single Extracellular Vesicle Analysis Performed by Imaging Flow Cytometry and Nanoparticle Tracking Analysis Evaluate the Accuracy of Urinary Extracellular Vesicle Preparation Techniques Differently
Source: MDPI journal article supplement (doi:10.3390/ijms222212436), 2021-11-18
Supplement: s1 [file s1]

## Supplementary Material

# Single Extracellular Vesicle Analysis Performed by Imaging Flow Cytometry and Nanoparticle Tracking Analysis Evaluate the Accuracy of Urinary Extracellular Vesicle Preparation Techniques Differently

Marvin Droste <sup>1</sup>, Tobias Tertel <sup>2</sup>, Stefanie Jeruschke <sup>1</sup>, Robin Dittrich <sup>2</sup>, Evangelia Kontopoulou <sup>3</sup>, Bernd Walkenfort <sup>4</sup>, Verena Börger <sup>2</sup>, Peter F. Hoyer <sup>1</sup>, Anja K. Büscher <sup>1,\*</sup>, Basant K. Thakur <sup>3,\*</sup> and Bernd Giebel <sup>2,\*</sup>

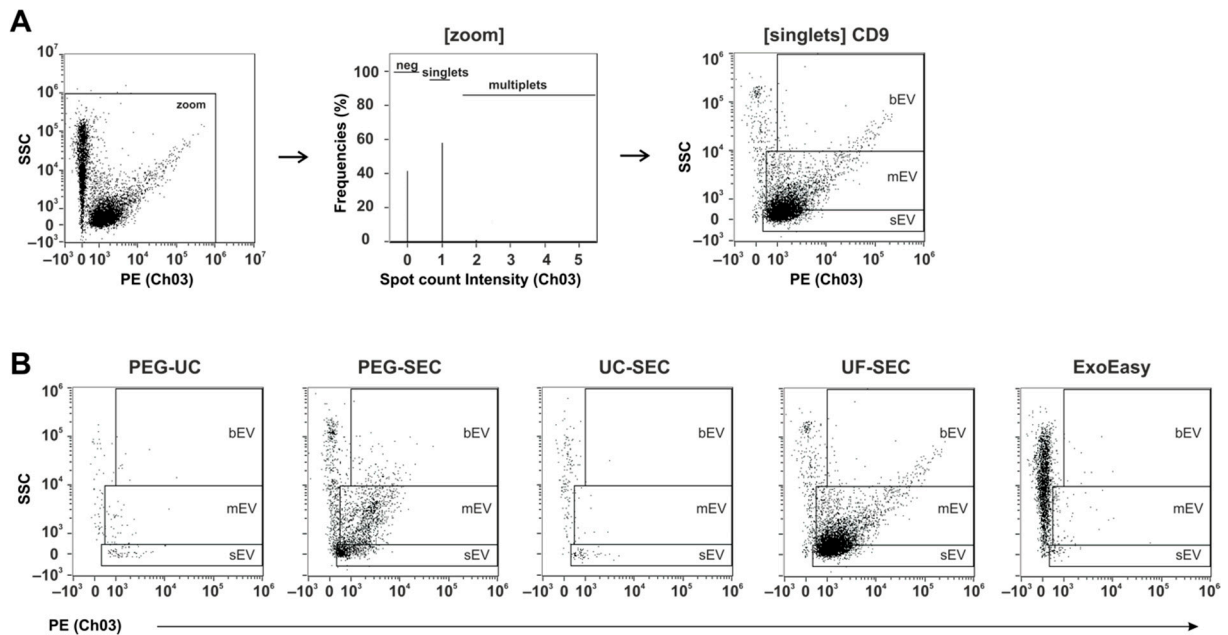

**Supplementary Figure S1.** (A) Gating strategy for the detection of CD9<sup>+</sup> objects using IFCM. At first, all recorded objects were plotted based on their side scatter signals (SSC) and their fluorescence intensities following anti-CD9 antibody staining (1<sup>st</sup> plot). For downstream analyses, coincidences (swarm detection) and objects lacking any fluorescent signal were discriminated from single fluorescent objects (singlets). Only singlets were considered in all downstream analyses. Singlets were also plotted in SSC to fluorescence intensity diagrams. Based on the SSC intensity, three different object subgroups were discriminated: small EVs (sEV), medium-sized EVs (mEV) and big EVs (bEV). (B) Representative flow plots of uEV samples prepared with all five methods.

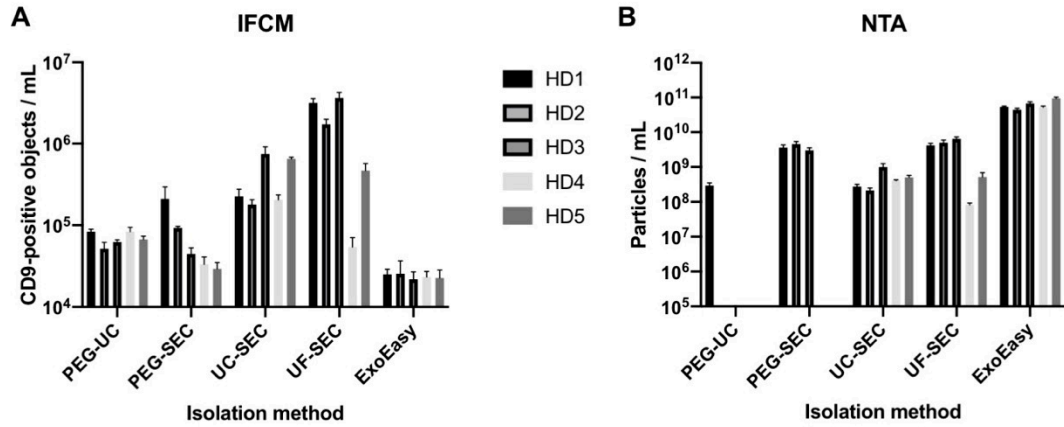

**Supplementary Figure S2.** Detail of Fig. 4: IFCM and NTA results of all prepared uEV samples measured by IFCM (**A**) or NTA (**B**), respectively. Error bars in **A** represent the standard deviation of three independent IFCM analyses of each sample and those in **B** the standard deviation of the data measured at 11 camera positions per sample using NTA.

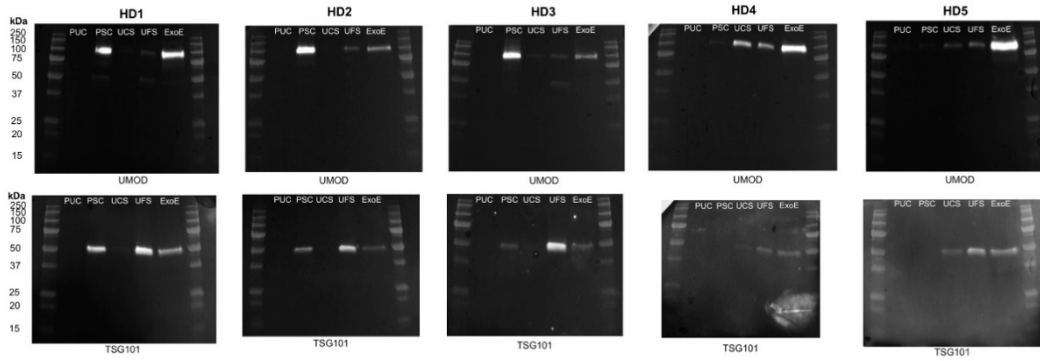

**Supplementary Figure S3.** Images of the TSG101 and UMOD Western blots of the uEV preparations obtained from all void urine samples with the different applied methods. Sample loading of  $-80^{\circ}\text{C}$  stored uEV samples was adjusted to volume equivalents of the initial void urine sample. Following sample separation under reducing conditions membranes were sequentially probed with anti-TSG101 and anti-UMOD antibodies (without stripping). HD = healthy donor sample, PUC: PEG-UC; PSC: PEG-SEC; UCS: UC-SEC; UFS: UF-SEC; ExoE: ExoEasy.

**Supplementary Table S4.** Data about the centrifuges, rotors and the centrifugation speed. SW = swing-out rotor, FA = fixed-angle rotor.

| Speed                                | Centrifuge           | Manufacturer                               | Rotor Name   | Rotor Type |
|--------------------------------------|----------------------|--------------------------------------------|--------------|------------|
| $\leq 4000\times g$                  | Heraeus Megafuge 16R | ThermoFisher Scientific, Osterode, Germany | TX-400       | SW         |
| $10,000\times g$<br>$17,000\times g$ | Sorvall RC6+         | ThermoFisher Scientific, Osterode, Germany | HB-6         | SW         |
| $> 100,000\times g$                  | Optima XPN-80        | Beckman Coulter, Krefeld, Germany          | Type 50.4 Ti | FA         |

**Supplementary Table S5.** List of the applied antibodies and isotype controls including information about their clone and ordering number as well as the applied dilution factor. \*The CD9 antibody (clone VJ1/20) was kindly provided by Dr. F. Sánchez-Madrid, Madrid, Spain.

| Antibody                  | Clone, cat. #        | Application | Manufacturer                                | Dilution |
|---------------------------|----------------------|-------------|---------------------------------------------|----------|
| CD9-PE (mouse)            | MEM-61, 1P-208-T100  | IFCM        | Exbio, Vestec, Czech Republic               | 1:100    |
| CD9 (mouse)               | VJ1/20               | WB          | F. Sánchez-Madrid*                          | 1:1,000  |
| CD63-APC (mouse)          | MEM-259, 1A-343-T100 | IFCM        | Exbio, Vestec, Czech Republic               | 1:100    |
| CD81-FITC (mouse)         | JS-64, B25329        | IFCM        | Beckman Coulter, Indianapolis, IN, USA      | 1:100    |
| TSG101 (rabbit)           | Polyclonal HPA006161 | WB          | Atlas Antibodies, Bromma, Sweden            | 1:1,000  |
| THP (UMOD)                | B-2 sc-271022        | WB          | Santa Cruz, Dallas, TX, USA                 | 1:200    |
| Goat anti-rabbit IgG-HRP  | Polyclonal sc-2004   | WB          | Santa Cruz, Dallas, TX, USA                 | 1:10,000 |
| Rabbit anti-mouse IgG-HRP | Polyclonal sc-358914 | WB          | Santa Cruz, Dallas, TX, USA                 | 1:10,000 |
| Mouse IgG2a-FITC          | S43.10 130-113-833   | IFCM        | Miltenyi Biotec, Bergisch Gladbach, Germany | 1:250    |
| Mouse IgG1-PE             | MOPC-21 555749       | IFCM        | BD Biosciences, Heidelberg, Germany         | 1:250    |
| Mouse IgG1-APC            | MOPC-21 400122       | IFCM        | BioLegend, San Diego, CA, USA               | 1:250    |

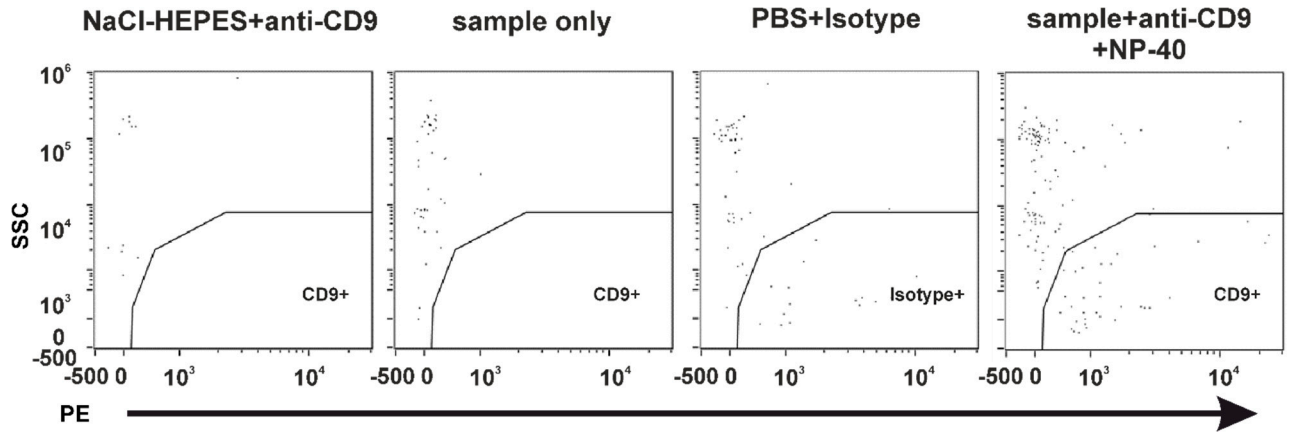

**Supplementary Figure S6.** Experimental controls in accordance with the MIFlowCyt-EV framework.

**Supplementary Table S7.** Applied laser settings for imaging flow cytometry.

| Laser [nm] | Used Power [mW] | Max. Power [mW] | Filter [nm]            |
|------------|-----------------|-----------------|------------------------|
| 375        | 70              | 70              | –                      |
| 488        | 100             | 100             | FITC (Ch02)<br>480-560 |
| 561        | 200             | 200             | PE (Ch03)<br>560-595   |
| 648        | 150             | 150             | APC (Ch11)<br>642-745  |
| 785 (SSC)  | 70              | 70              | SSC (Ch06)<br>756-780  |

**Supplementary Table S8.** Applied compensation matrix for imaging flow cytometry.

|      | Ch1   | Ch2   | Ch3   | Ch4 | Ch5 | Ch6 | Ch7 | Ch8 | Ch9   | Ch10 | Ch11  | Ch12 |
|------|-------|-------|-------|-----|-----|-----|-----|-----|-------|------|-------|------|
| Ch1  | 1     | 0.029 | 0.042 | 0   | 0   | 0   | 0   | 0   | 0     | 0    | 0.002 | 0    |
| Ch2  | 0.051 | 1     | 0.05  | 0   | 0   | 0   | 0   | 0   | 0     | 0    | 0.002 | 0    |
| Ch3  | 0     | 0.13  | 1     | 0   | 0   | 0   | 0   | 0   | 0.02  | 0    | 0.002 | 0    |
| Ch4  | 0     | 0.064 | 0.49  | 1   | 0   | 0   | 0   | 0   | 0     | 0    | 0.003 | 0    |
| Ch5  | 0     | 0.017 | 0.155 | 0   | 1   | 0   | 0   | 0   | 0     | 0    | 0.074 | 0    |
| Ch6  | 0.015 | 0.02  | 0.04  | 0   | 0   | 1   | 0   | 0   | 0     | 0    | 0.01  | 0    |
| Ch7  | 0.023 | 0.003 | 0.003 | 0   | 0   | 0   | 1   | 0   | 0.015 | 0    | 0.024 | 0    |
| Ch8  | 0     | 0.032 | 0.008 | 0   | 0   | 0   | 0   | 1   | 0.012 | 0    | 0.023 | 0    |
| Ch9  | 0     | 0.004 | 0.084 | 0   | 0   | 0   | 0   | 0   | 1     | 0    | 0.024 | 0    |
| Ch10 | 0     | 0.002 | 0.041 | 0   | 0   | 0   | 0   | 0   | 0.084 | 1    | 0.028 | 0    |
| Ch11 | 0     | 0.001 | 0.012 | 0   | 0   | 0   | 0   | 0   | 0.025 | 0    | 1     | 0    |
| Ch12 | 0     | 0     | 0.003 | 0   | 0   | 0   | 0   | 0   | 0.013 | 0    | 0.125 | 1    |
